# Supplementary material for: Huotan Jiedu Tongluo Decoction Inhibits Balloon-Injury-Induced Carotid Artery Intimal Hyperplasia in the Rat through the PERK-eIF2α-ATF4 Pathway and Autophagy Mediation
Source: Hindawi journal article supplement (doi:10.1155/2021/5536237), 2021-07-20
Supplement: f1 [file 5536237.f1.pdf]

| Name                                                                    | Formula         | CAS num     | Class                                  | Molecular Weight | RT [min] | Molecular Weight(Theoretical value) | Δppm | Area: zhongyafufangdongganfen-P.raw (F2) | Relative concentration of each substance in HJJD1D (ug/ml) |
|-------------------------------------------------------------------------|-----------------|-------------|----------------------------------------|------------------|----------|-------------------------------------|------|------------------------------------------|------------------------------------------------------------|
| Salvianolic acid B                                                      | C36 H30 O16     | 121521-90-2 | 2-arylbenzofuran flavonoids            | 718.15345        | 7.782    | 718.15338                           | 0    | 103087960.9                              | 4.913                                                      |
| Lithospermic acid                                                       | C27 H22 O12     | 28831-65-4  | 2-arylbenzofuran flavonoids            | 538.11144        | 7.774    | 538.11131                           | 0    | 358070403.2                              | 17.065                                                     |
| 1-[2-(1,3-Benzodioxol-5-yl)-3-methyl-1-benzofuran-5-yl]-1,2-propanediol | C19 H18 O5      | NA          | 2-arylbenzofuran flavonoids            | 326.11529        | 11.657   | 326.11542                           | 0    | 23196873.73                              | 1.106                                                      |
| N-(2-AMINOETHYL)ETHYLENEUREA                                            | C5 H11 N3 O     | 6281-42-1   | Azolidines                             | 129.09037        | 0.839    | 129.09021                           | 1    | 247118583.8                              | 11.777                                                     |
| 4-Ethynylaniline                                                        | C8 H7 N         | 14235-81-5  | Benzene and substituted derivatives    | 117.05808        | 4.518    | 117.05785                           | 1    | 45798517.73                              | 2.183                                                      |
| 2,4-Dimethylbenzaldehyde                                                | C9 H10 O        | 15764-16-6  | Benzene and substituted derivatives    | 134.07324        | 9.393    | 134.07316                           | 0    | 30600048.8                               | 1.458                                                      |
| 3',4'-Dihydroxyphenylacetone                                            | C9 H10 O3       | 2503-44-8   | Benzene and substituted derivatives    | 166.06312        | 8.494    | 166.06299                           | 0    | 125432247.9                              | 5.978                                                      |
| 3',4'-Dihydroxyphenylacetone                                            | C9 H10 O3       | 2503-44-8   | Benzene and substituted derivatives    | 166.06311        | 2.958    | 166.06299                           | 0    | 111246208.4                              | 5.302                                                      |
| 4-Phenylcyclohexanone                                                   | C12 H14 O       | 4894-75-1   | Benzene and substituted derivatives    | 174.1045         | 8.657    | 174.10447                           | 0    | 211949771.6                              | 10.101                                                     |
| Phenylglyoxylic acid                                                    | C8 H6 O3        | 611-73-4    | Benzene and substituted derivatives    | 150.03179        | 5.358    | 150.03169                           | 0    | 587510140.2                              | 28.000                                                     |
| Phenacetin                                                              | C10 H13 N O2    | 62-44-2     | Benzene and substituted derivatives    | 179.09474        | 1.115    | 179.09463                           | 0    | 42302224.75                              | 2.016                                                      |
| Phthalaldehyde                                                          | C8 H6 O2        | 643-79-8    | Benzene and substituted derivatives    | 134.03691        | 5.249    | 134.03678                           | 0    | 88914901.45                              | 4.238                                                      |
| 4,7-dihydroxymellein_130075                                             | C10 H10 O5      | NA          | Benzopyrans                            | 210.05284        | 5.223    | 210.05282                           | 0    | 142304211.4                              | 6.782                                                      |
| Boc-Asp-OH                                                              | C9 H15 N O6     | 13726-67-5  | Carboxylic acids and derivatives       | 233.08985        | 0.774    | 233.08994                           | 0    | 683543664.1                              | 32.576                                                     |
| D-(+)-Pipicolinic acid                                                  | C6 H11 N O2     | 1723-00-8   | Carboxylic acids and derivatives       | 129.07918        | 0.847    | 129.07898                           | 0    | 248008034.9                              | 11.820                                                     |
| D-(+)-Proline                                                           | C5 H9 N O2      | 344-25-2    | Carboxylic acids and derivatives       | 115.06358        | 0.799    | 115.06333                           | 2    | 1696509265                               | 80.853                                                     |
| DL-Stachydrine                                                          | C7 H13 N O2     | 4136-37-2   | Carboxylic acids and derivatives       | 143.09473        | 0.828    | 143.09463                           | 0    | 236314220.6                              | 11.262                                                     |
| L-Glutamic acid                                                         | C5 H9 N O4      | 56-86-0     | Carboxylic acids and derivatives       | 147.05321        | 0.78     | 147.05316                           | 0    | 360846116.9                              | 17.197                                                     |
| Metaxyl                                                                 | C15 H21 N O4    | 57837-19-1  | Carboxylic acids and derivatives       | 279.14699        | 4.697    | 279.14706                           | 0    | 13875073.59                              | 0.661                                                      |
| DL-Glutamine                                                            | C5 H10 N2 O3    | 585-21-7    | Carboxylic acids and derivatives       | 146.0692         | 0.769    | 146.06914                           | 0    | 212821887.9                              | 10.143                                                     |
| L-Phenylalanine                                                         | C9 H11 N O2     | 63-91-2     | Carboxylic acids and derivatives       | 165.07913        | 2.249    | 165.07898                           | 0    | 211273475.8                              | 10.069                                                     |
| Latamoxif                                                               | C20 H20 N6 O9 S | 64952-97-2  | Carboxylic acids and derivatives       | 520.101          | 7.776    | 520.10125                           | 0    | 779731307                                | 37.161                                                     |
| DL-Arginine                                                             | C6 H14 N4 O2    | 7200-25-1   | Carboxylic acids and derivatives       | 174.11173        | 0.728    | 174.11168                           | 0    | 2644881072                               | 126.050                                                    |
| L-Valine                                                                | C5 H11 N O2     | 72-18-4     | Carboxylic acids and derivatives       | 117.07923        | 0.799    | 117.07898                           | 2    | 262766638.6                              | 12.523                                                     |
| L-Isoleucine                                                            | C6 H13 N O2     | 73-32-5     | Carboxylic acids and derivatives       | 131.0948         | 1.323    | 131.09463                           | 1    | 425301786.7                              | 20.269                                                     |
| L-Pyroglutamic acid                                                     | C5 H7 N O3      | 98-79-3     | Carboxylic acids and derivatives       | 129.04276        | 1.139    | 129.04259                           | 1    | 721064320.8                              | 34.365                                                     |
| N-(2,6-Dimethylphenyl)-N-(methoxyacetyl) alanine                        | C14 H19 N O4    | NA          | Carboxylic acids and derivatives       | 265.13155        | 1.225    | 265.13141                           | 0    | 35268754.43                              | 1.681                                                      |
| N-Fructosyl isoleucine                                                  | C12 H23 N O7    | NA          | Carboxylic acids and derivatives       | 293.14737        | 1.318    | 293.14745                           | 0    | 505362969.2                              | 24.085                                                     |
| N-Fructosyl phenylalanine                                               | C15 H21 N O7    | NA          | Carboxylic acids and derivatives       | 327.13172        | 2.152    | 327.1318                            | 0    | 110231589.1                              | 5.253                                                      |
| Caffeic acid                                                            | C9 H8 O4        | 331-39-5    | Cinnamic acids and derivatives         | 180.04231        | 4.47     | 180.04226                           | 0    | 159683453.5                              | 7.610                                                      |
| Caffeic acid                                                            | C9 H8 O4        | 331-39-5    | Cinnamic acids and derivatives         | 180.04232        | 7.466    | 180.04226                           | 0    | 138959515.2                              | 6.623                                                      |
| Caffeic acid                                                            | C9 H8 O4        | 331-39-5    | Cinnamic acids and derivatives         | 180.04231        | 7.265    | 180.04226                           | 0    | 85475345.96                              | 4.074                                                      |
| Sinapic acid                                                            | C11 H12 O5      | 530-59-6    | Cinnamic acids and derivatives         | 224.06847        | 6.086    | 224.06847                           | 0    | 92489552.55                              | 4.408                                                      |
| Isoferulic acid                                                         | C10 H10 O4      | 537-73-5    | Cinnamic acids and derivatives         | 194.05801        | 4.774    | 194.05791                           | 0    | 24318380.73                              | 1.159                                                      |
| Ferulic acid                                                            | C10 H10 O4      | 537-98-4    | Cinnamic acids and derivatives         | 194.05802        | 6.888    | 194.05791                           | 0    | 55734122.98                              | 2.656                                                      |
| 2-Hydroxycinnamic acid                                                  | C9 H8 O3        | 614-60-8    | Cinnamic acids and derivatives         | 164.04753        | 1.226    | 164.04734                           | 1    | 98369375.31                              | 4.688                                                      |
| 4-Methoxycinnamic acid                                                  | C10 H10 O3      | 830-09-1    | Cinnamic acids and derivatives         | 178.06319        | 8.015    | 178.06299                           | 1    | 13031352.34                              | 0.621                                                      |
| Aflatoxin B1                                                            | C17 H12 O6      | 1162-65-8   | Coumarins and derivatives              | 312.06319        | 7.775    | 312.06339                           | 0    | 23778999.57                              | 1.133                                                      |
| 4-Methylumbelliferyl-α-D-glucopyranoside                                | C16 H18 O8      | 17833-43-1  | Coumarins and derivatives              | 338.10015        | 7.088    | 338.10017                           | 0    | 65866231.79                              | 3.139                                                      |
| 4-Methylumbelliferone                                                   | C10 H8 O3       | 90-33-5     | Coumarins and derivatives              | 176.04744        | 5.361    | 176.04734                           | 0    | 88571979.41                              | 4.221                                                      |
| 7-Hydroxycoumarin                                                       | C9 H6 O3        | 93-35-6     | Coumarins and derivatives              | 162.03174        | 5.248    | 162.03169                           | 0    | 924490140.7                              | 44.060                                                     |
| Uracil                                                                  | C4 H4 N2 O2     | 66-22-8     | Diazines                               | 112.02765        | 1.147    | 112.02728                           | 3    | 21261639                                 | 1.013                                                      |
| Cytosine                                                                | C4 H5 N3 O      | 71-30-7     | Diazines                               | 111.04359        | 0.821    | 111.04326                           | 2    | 36861177.56                              | 1.757                                                      |
| Sarracenin                                                              | C11 H14 O5      | 59653-37-1  | Dioxanes                               | 226.08412        | 6.342    | 226.08412                           | 0    | 276811035.6                              | 13.192                                                     |
| 9-Oxo-ODE                                                               | C18 H30 O3      | NA          | Fatty Acyls                            | 294.21932        | 9.878    | 294.21949                           | 0    | 21036162.67                              | 1.003                                                      |
| 9S,13R-12-Oxophytodienoic acid                                          | C18 H28 O3      | NA          | Fatty Acyls                            | 292.20368        | 9.527    | 292.20384                           | 0    | 27576581.21                              | 1.314                                                      |
| S(8)-(2-methylpropanoyl)dihydrolipoamide                                | C12 H23 N O2 S2 | NA          | Fatty Acyls                            | 277.11601        | 0.815    | 277.11702                           | -3   | 219804423.4                              | 10.475                                                     |
| Quercetin                                                               | C15 H10 O7      | 117-39-5    | Flavonoids                             | 302.0425         | 6.684    | 302.04265                           | 0    | 17934549.01                              | 0.855                                                      |
| Rutin                                                                   | C27 H30 O16     | 153-18-4    | Flavonoids                             | 610.15386        | 7.515    | 610.15338                           | 0    | 23448530.16                              | 1.118                                                      |
| Keracyanin                                                              | C27 H30 O15     | 28338-59-2  | Flavonoids                             | 594.15898        | 6.587    | 594.15847                           | 0    | 16652244.37                              | 0.794                                                      |
| Neodiosmin                                                              | C28 H32 O15     | 38665-01-9  | Flavonoids                             | 608.17467        | 7.043    | 608.17412                           | 0    | 15658630.8                               | 0.746                                                      |
| Quercetin-3-β-D-glucoside                                               | C21 H20 O12     | 482-35-9    | Flavonoids                             | 464.09556        | 6.686    | 464.09548                           | 0    | 51642967.48                              | 2.461                                                      |
| Afzelin                                                                 | C21 H20 O10     | 482-39-3    | Flavonoids                             | 432.10561        | 8.542    | 432.10565                           | 0    | 11507316.28                              | 0.548                                                      |
| Kaempferol                                                              | C15 H10 O6      | 520-18-3    | Flavonoids                             | 286.04744        | 9.853    | 286.04774                           | -1   | 31315176.6                               | 1.492                                                      |
| Kaempferol                                                              | C15 H10 O6      | 520-18-3    | Flavonoids                             | 286.04744        | 7.559    | 286.04774                           | -1   | 12146583.69                              | 0.579                                                      |
| Quercitrin                                                              | C21 H20 O11     | 522-12-3    | Flavonoids                             | 448.1006         | 7.822    | 448.10056                           | 0    | 57394027.33                              | 2.735                                                      |
| Cynaroside                                                              | C21 H20 O11     | 5373-11-5   | Flavonoids                             | 448.1006         | 6.689    | 448.10056                           | 0    | 56319762.41                              | 2.684                                                      |
| 4',7-Dihydroxyflavanone                                                 | C15 H12 O4      | 69097-97-8  | Flavonoids                             | 256.07347        | 6.661    | 256.07356                           | 0    | 281721656.3                              | 13.426                                                     |
| 4',7-Dihydroxyflavanone                                                 | C15 H12 O4      | 69097-97-8  | Flavonoids                             | 256.07347        | 8.739    | 256.07356                           | 0    | 27567568.94                              | 1.314                                                      |
| Cantharidin                                                             | C10 H12 O4      | 56-25-7     | Furofurans                             | 196.07373        | 4.83     | 196.07356                           | 0    | 51773441.7                               | 2.467                                                      |
| Cantharidin                                                             | C10 H12 O4      | 56-25-7     | Furofurans                             | 196.07368        | 5.803    | 196.07356                           | 0    | 257119310.3                              | 12.254                                                     |
| 2,3,4,9-Tetrahydro-1H-β-carboline-3-carboxylic acid                     | C12 H12 N2 O2   | 82789-18-2  | Harmala alkaloids                      | 216.08991        | 5.431    | 216.08988                           | 0    | 25800808.9                               | 1.230                                                      |
| Hypoxanthine                                                            | C5 H4 N4 O      | 68-94-0     | Imidazopyrimidines                     | 136.03864        | 1.116    | 136.03851                           | 0    | 30109779.92                              | 1.435                                                      |
| Adenine                                                                 | C5 H5 N5        | 73-24-5     | Imidazopyrimidines                     | 135.0546         | 0.836    | 135.0545                            | 0    | 187969881.4                              | 8.958                                                      |
| Guanine                                                                 | C5 H5 N5 O      | 73-40-5     | Imidazopyrimidines                     | 151.0495         | 0.845    | 151.04941                           | 0    | 32413530.46                              | 1.545                                                      |
| 4-Indolecarbaldehyde                                                    | C9 H7 N O       | 1047-86-6   | Indoles and derivatives                | 145.05278        | 4.55     | 145.05276                           | 0    | 26993897.26                              | 1.286                                                      |
| trans-3-Indoleacrylic acid                                              | C11 H9 N O2     | 1204-06-4   | Indoles and derivatives                | 187.06334        | 4.551    | 187.06333                           | 0    | 344377146.4                              | 16.412                                                     |
| Senkyunolide A                                                          | C12 H16 O2      | 63038-10-8  | Isobenzofurans                         | 192.11507        | 8.658    | 192.11503                           | 0    | 117789526                                | 56.136                                                     |
| Formononetin                                                            | C16 H12 O4      | 485-72-3    | Isoflavonoids                          | 268.07335        | 10.435   | 268.07356                           | 0    | 13823096.57                              | 0.659                                                      |
| Ononin                                                                  | C22 H22 O9      | 486-62-4    | Isoflavonoids                          | 430.12651        | 7.769    | 430.12638                           | 0    | 75374284.8                               | 3.592                                                      |
| 6-Acetylmorphine                                                        | C19 H21 N O4    | 2784-73-8   | Morphinans                             | 327.14714        | 5.592    | 327.14706                           | 0    | 17876664.46                              | 0.852                                                      |
| 3,5-Dihydroxy-2-naphthoic acid                                          | C11 H8 O4       | 89-35-0     | Naphthalenes                           | 204.04244        | 7.492    | 204.04226                           | 0    | 11313227.02                              | 0.539                                                      |
| 2-Naphthylamine                                                         | C10 H9 N        | 91-59-8     | Naphthalenes                           | 143.07358        | 5.431    | 143.0735                            | 0    | 21445912.51                              | 1.022                                                      |
| Diethylpyrocarbonate                                                    | C6 H10 O5       | 1609-47-8   | Organic carbonic acids and derivatives | 162.05282        | 0.798    | 162.05282                           | 0    | 246906910.9                              | 11.767                                                     |
| (2,3-Dihydroxypropyl)arsonic acid                                       | C3 H9 As O5     | NA          | Organometaloid compounds               | 199.96574        | 0.67     | 199.96559                           | -4   | 296835570.3                              | 14.147                                                     |
| Acetyl-β-methylcholine                                                  | C8 H17 N O2     | 55-92-5     | Organonitrogen compounds               | 159.12602        | 0.839    | 159.12593                           | 0    | 49633002.03                              | 2.365                                                      |
| Choline                                                                 | C5 H13 N O      | 62-49-7     | Organonitrogen compounds               | 103.1001         | 0.748    | 103.09971                           | 3    | 1725458496                               | 82.232                                                     |
| Maltotriose                                                             | C18 H32 O16     | 1109-28-0   | Organooxygen compounds                 | 504.16898        | 0.771    | 504.16903                           | 0    | 468079672                                | 22.308                                                     |
| Muramic acid                                                            | C9 H17 N O7     | 1114-41-6   | Organooxygen compounds                 | 251.1004         | 0.775    | 251.1005                            | 0    | 90822871.32                              | 4.328                                                      |
| 4-Hydroxybenzaldehyde                                                   | C7 H6 O2        | 123-08-0    | Organooxygen compounds                 | 122.03705        | 5.367    | 122.03678                           | 2    | 24622943.85                              | 1.173                                                      |
| 3,4-Dihydroxybenzaldehyde                                               | C7 H6 O3        | 139-85-5    | Organooxygen compounds                 | 138.03183        | 5.029    | 138.03169                           | 1    | 15178607.2                               | 0.723                                                      |
| Sweroside                                                               | C16 H22 O9      | 14215-86-2  | Organooxygen compounds                 | 358.12625        | 5.802    | 358.12638                           | 0    | 240123645.1                              | 11.444                                                     |
| 4,5-Dicafeoylquinic acid                                                | C25 H24 O12     | 14534-61-3  | Organooxygen compounds                 | 516.1269         | 7.263    | 516.12678                           | 0    | 301305635.6                              | 14.360                                                     |
| Heptanophenone                                                          | C13 H18 O       | 1671-75-6   | Organooxygen compounds                 | 190.13585        | 10.82    | 190.13577                           | 0    | 13377518.78                              | 0.638                                                      |
| 2,3-dihydroxy-1-(4-hydroxy-3-methoxyphenyl)propan-1-one                 | C10 H12 O5      | 168293-10-5 | Organooxygen compounds                 | 212.06847        | 5.36     | 212.06847                           | 0    | 562112543.9                              | 26.789                                                     |
| Swertiamarin                                                            | C16 H22 O10     | 17388-39-5  | Organooxygen compounds                 | 374.1212         | 5.362    | 374.1213                            | 0    | 315133290.6                              | 15.019                                                     |
| Amygdalin                                                               | C20 H27 N O11   | 29883-15-6  | Organooxygen compounds                 | 457.15859        | 6.596    | 457.15841                           | 0    | 21276704.64                              | 1.014                                                      |
| Chlorogenic acid                                                        | C16 H18 O9      | 327-97-9    | Organooxygen compounds                 | 354.0949         | 5.248    | 354.09508                           | 0    | 1121635893                               | 53.455                                                     |
| galactinol                                                              | C12 H22 O11     | 3687-64-7   | Organooxygen compounds                 | 342.11603        | 0.782    | 342.11621                           | 0    | 2715591258                               | 129.420                                                    |
| 4-(Trifluoroacetyl)benzoic acid                                         | C9 H5 F3 O3     | 58808-59-6  | Organooxygen compounds                 | 218.01923        | 0.762    | 218.01908                           | 0    | 213702077.8                              | 10.185                                                     |
| Glucose 1-phosphate                                                     | C6 H13 O9 P     | 59-56-3     | Organooxygen compounds                 | 260.02962        | 0.808    | 260.02972                           | 0    | 50605636.01                              | 2.412                                                      |
| 5-Hydroxymethyl-2-furaldehyde                                           | C6 H6 O3        | 67-47-0     | Organooxygen compounds                 | 126.03185        |          |                                     |      |                                          |                                                            |

|  |  | Negative ion mode                                                                                                                                                                           |                    |             |                                     |                  |          |                                     |      |                                           |                                                            |  |  |
|--|--|---------------------------------------------------------------------------------------------------------------------------------------------------------------------------------------------|--------------------|-------------|-------------------------------------|------------------|----------|-------------------------------------|------|-------------------------------------------|------------------------------------------------------------|--|--|
|  |  | Name                                                                                                                                                                                        | Formula            | CAS num     | Class                               | Molecular Weight | RT [min] | Molecular Weight(Theoretical value) | Δppm | Area: zhongyaozufangdongganfen-N.raw (F2) | Relative concentration of each substance in HTJDLB (ug/ml) |  |  |
|  |  | Lithospermic acid                                                                                                                                                                           | C27 H22 O12        | 28831-65-4  | 2-arylbenzofuran flavonoids         | 538.11122        | 7.498    | 538.11113                           | 0    | 126174105.7                               | 61.782                                                     |  |  |
|  |  | 4-[(E)-3-[1-carboxy-2-(3,4-dihydroxyphenyl)ethoxy]-3-oxoprop-1-enyl]-2-(3,4-dihydroxyphenyl)-7-hydroxy-2,3-dihydro-1-benzofuran-3-carboxylic acid                                           | C27 H22 O12        | NA          | 2-arylbenzofuran flavonoids         | 538.11122        | 7.11     | 538.11113                           | 0    | 123990630.6                               | 60.713                                                     |  |  |
|  |  | (2R)-2-[(E)-3-[1-(R)-1-carboxy-2-(3,4-dihydroxyphenyl)ethoxy]carbonyl-2-(3,4-dihydroxyphenyl)-7-hydroxy-2,3-dihydro-1-benzofuran-4-yl]prop-2-enyl]oxy-3-(3,4-dihydroxyphenyl)propanoic acid | C36 H30 O16        | NA          | 2-arylbenzofuran flavonoids         | 718.15413        | 7.776    | 718.15338                           | 1    | 4622354482                                | 2263.382                                                   |  |  |
|  |  | Homogentisic acid                                                                                                                                                                           | C8 H8 O4           | 451-13-8    | Benzene and substituted derivatives | 168.04147        | 2.935    | 168.04226                           | -4   | 8155324.273                               | 3.993                                                      |  |  |
|  |  | Gallic acid                                                                                                                                                                                 | C7 H6 O5           | 149-91-7    | Benzene and substituted derivatives | 170.02075        | 1.764    | 170.02152                           | -4   | 480122967.5                               | 235.097                                                    |  |  |
|  |  | Octyl gallate                                                                                                                                                                               | C15 H22 O5         | 1034-01-1   | Benzene and substituted derivatives | 282.14683        | 9.228    | 282.14672                           | 0    | 52053620.16                               | 25.489                                                     |  |  |
|  |  | Picloxidine                                                                                                                                                                                 | C20 H24 Cl2 N10    | 5636-92-0   | Benzene and substituted derivatives | 474.15851        | 0.807    | 474.15625                           | 4    | 2038381214                                | 998.114                                                    |  |  |
|  |  | L-Phenylalanine                                                                                                                                                                             | C9 H11 N O2        | 63-91-2     | Carboxylic acids and derivatives    | 165.07817        | 2.204    | 165.07898                           | -4   | 23238723.53                               | 11.379                                                     |  |  |
|  |  | cis-Aconitic acid                                                                                                                                                                           | C6 H6 O6           | 585-84-2    | Carboxylic acids and derivatives    | 174.01562        | 0.896    | 174.01644                           | -4   | 82067063.56                               | 40.185                                                     |  |  |
|  |  | L-Tyrosine                                                                                                                                                                                  | C9 H11 N O3        | 60-18-4     | Carboxylic acids and derivatives    | 181.07316        | 1.214    | 181.07389                           | -4   | 17683431.43                               | 8.659                                                      |  |  |
|  |  | N-Fructosyl pyroglutamate                                                                                                                                                                   | C11 H17 N O8       | NA          | Carboxylic acids and derivatives    | 291.09553        | 1.114    | 291.09542                           | 0    | 230091024.6                               | 112.666                                                    |  |  |
|  |  | beta-d-glucose pentaacetate                                                                                                                                                                 | C16 H22 O11        | 4163-59-1   | Carboxylic acids and derivatives    | 390.11639        | 5.215    | 390.11621                           | 0    | 1780343757                                | 871.763                                                    |  |  |
|  |  | beta-d-glucose pentaacetate                                                                                                                                                                 | C16 H22 O11        | 4163-59-1   | Carboxylic acids and derivatives    | 390.11639        | 2.586    | 390.11621                           | 0    | 171363216.8                               | 83.910                                                     |  |  |
|  |  | Caffeic acid                                                                                                                                                                                | C9 H8 O4           | 331-39-5    | Cinnamic acids and derivatives      | 180.0415         | 5.73     | 180.04226                           | -4   | 202576352.3                               | 99.194                                                     |  |  |
|  |  | Ferulic acid                                                                                                                                                                                | C10 H10 O4         | 537-98-4    | Cinnamic acids and derivatives      | 194.05723        | 6.89     | 194.05791                           | -3   | 7298717.08                                | 35.739                                                     |  |  |
|  |  | Hydroxyferulic acid                                                                                                                                                                         | C10 H10 O5         | 1782-55-4   | Cinnamic acids and derivatives      | 210.05225        | 5.082    | 210.05282                           | -2   | 89454388.09                               | 43.802                                                     |  |  |
|  |  | Rosmarinic acid                                                                                                                                                                             | C18 H16 O8         | 20283-92-5  | Cinnamic acids and derivatives      | 360.08467        | 7.47     | 360.08452                           | 0    | 495819855.3                               | 242.783                                                    |  |  |
|  |  | [(Carbamoylamino)methyl]carbamate                                                                                                                                                           | C3 H6 N3 O3        | NA          | Diazines                            | 132.04151        | 0.8      | 132.04092                           | 4    | 1905636208                                | 933.114                                                    |  |  |
|  |  | Suberic acid                                                                                                                                                                                | C8 H14 O4          | 505-48-6    | Fatty Acyls                         | 174.08839        | 6.57     | 174.08921                           | -4   | 5993165.389                               | 2.935                                                      |  |  |
|  |  | 3-tert-Butyladipic acid                                                                                                                                                                     | C10 H18 O4         | 10347-88-3  | Fatty Acyls                         | 202.11995        | 8.656    | 202.12051                           | -2   | 8800949.99                                | 4.309                                                      |  |  |
|  |  | Oleic acid alkene                                                                                                                                                                           | C18 H30 O2         | 151333-45-8 | Fatty Acyls                         | 278.22444        | 15.895   | 278.22458                           | 0    | 5426963.579                               | 2.657                                                      |  |  |
|  |  | Corchorifatty acid F                                                                                                                                                                        | C18 H32 O5         | 95341-44-9  | Fatty Acyls                         | 328.22514        | 9.528    | 328.22497                           | 0    | 141261021                                 | 69.170                                                     |  |  |
|  |  | (15Z)-9,12,13-Trihydroxy-15-octadecenoic acid                                                                                                                                               | C18 H34 O5         | NA          | Fatty Acyls                         | 330.24077        | 9.883    | 330.24062                           | 0    | 219651082.4                               | 107.554                                                    |  |  |
|  |  | Luteolin                                                                                                                                                                                    | C15 H10 O6         | 491-70-3    | Flavonoids                          | 286.04774        | 9.853    | 286.04774                           | 0    | 62617659.95                               | 30.661                                                     |  |  |
|  |  | Catechin                                                                                                                                                                                    | C15 H14 O6         | 88191-48-4  | Flavonoids                          | 290.07893        | 5.884    | 290.07904                           | 0    | 6661192.727                               | 3.262                                                      |  |  |
|  |  | Quercetin                                                                                                                                                                                   | C15 H10 O7         | 117-39-5    | Flavonoids                          | 302.04265        | 8.972    | 302.04265                           | 0    | 7057322.608                               | 3.456                                                      |  |  |
|  |  | 7-hydroxy-2-[4-[(2S,3R,4S,5S,6R)-3,4,5-trihydroxy-6-(hydroxymethyl)oxan-2-yl]oxyphenyl]-2,3-dihydrochromen-4-one                                                                            | C21 H22 O9         | NA          | Flavonoids                          | 418.12676        | 6.664    | 418.12638                           | 0    | 503725979.9                               | 246.654                                                    |  |  |
|  |  | Afzelin                                                                                                                                                                                     | C21 H20 O10        | 482-39-3    | Flavonoids                          | 432.10573        | 7.561    | 432.10565                           | 0    | 36498324.1                                | 17.872                                                     |  |  |
|  |  | 7-Hydroxy-2-(4-hydroxyphenyl)-4-oxo-3,4-dihydro-2H-chromen-5-yl β-D-glucopyranoside                                                                                                         | C21 H22 O10        | NA          | Flavonoids                          | 434.12141        | 7.298    | 434.1213                            | 0    | 20095955.59                               | 9.840                                                      |  |  |
|  |  | Quercetin-3-O-rhamnoside                                                                                                                                                                    | C21 H20 O11        | 522-12-3    | Flavonoids                          | 448.10077        | 7.825    | 448.10056                           | 0    | 82466769.03                               | 40.381                                                     |  |  |
|  |  | Kaempferol-7-O-glucoside                                                                                                                                                                    | C21 H20 O11        | 16290-07-6  | Flavonoids                          | 448.10078        | 6.693    | 448.10056                           | 0    | 121664360                                 | 59.574                                                     |  |  |
|  |  | Astragalin                                                                                                                                                                                  | C21 H20 O11        | 480-10-4    | Flavonoids                          | 448.10078        | 7.059    | 448.10056                           | 0    | 23509946.38                               | 11.512                                                     |  |  |
|  |  | Quercetin-3-O-rutinoside                                                                                                                                                                    | C27 H30 O16        | 153-18-4    | Flavonoids                          | 610.15376        | 7.518    | 610.15338                           | 0    | 70762143.43                               | 34.649                                                     |  |  |
|  |  | Rutin                                                                                                                                                                                       | C27 H30 O16        | 153-18-4    | Flavonoids                          | 610.15401        | 6.46     | 610.15338                           | 1    | 110562467.4                               | 54.138                                                     |  |  |
|  |  | Viscumneoside V                                                                                                                                                                             | C32 H40 O19        | 119016-92-1 | Flavonoids                          | 728.2173         | 5.356    | 728.21638                           | 1    | 193837665.5                               | 94.915                                                     |  |  |
|  |  | 8-Cyclopentyltheophylline                                                                                                                                                                   | C12 H16 N4 O2      | 35873-49-5  | Imidazopyrimidines                  | 248.12612        | 4.714    | 248.12733                           | -4   | 773459447.2                               | 378.732                                                    |  |  |
|  |  | DL-Tryptophan                                                                                                                                                                               | C11 H12 N2 O2      | 1954-12-6   | Indoles and derivatives             | 204.08934        | 4.525    | 204.08988                           | -2   | 40727867.06                               | 19.943                                                     |  |  |
|  |  | Formononetin                                                                                                                                                                                | C16 H12 O4         | 485-72-3    | Isoflavonoids                       | 268.07353        | 8.716    | 268.07356                           | 0    | 11321683.31                               | 5.544                                                      |  |  |
|  |  | 4-[4-(4-Hydroxy-3-methoxyphenyl)tetrahydro-1H,3H-furo[3,4-c]furan-1-yl]-2-methoxyphenyl hexopyranoside                                                                                      | C26 H32 O11        | 11042-30-1  | Lignan glycosides                   | 520.19417        | 6.921    | 520.19446                           | 0    | 21520378.45                               | 10.538                                                     |  |  |
|  |  | Lariciresinol 4-O-glucoside                                                                                                                                                                 | C26 H34 O11        | NA          | Lignan glycosides                   | 522.21026        | 6.526    | 522.21011                           | 0    | 20609349.9                                | 10.092                                                     |  |  |
|  |  | 1,9b-Dihydroxy-6,6,9a-trimethyl-5,5a,6,7,8,9,9a,9b-octahydronaphtho[1,2-c]furan-3(1H)-one                                                                                                   | C15 H22 O4         | NA          | Naphthofurans                       | 266.15181        | 10.351   | 266.15181                           | 0    | 43220221.42                               | 21.163                                                     |  |  |
|  |  | Pseudouridine                                                                                                                                                                               | C9 H12 N2 O6       | 1445-07-4   | Nucleoside and nucleotide analogues | 244.06937        | 1.145    | 244.06954                           | 0    | 25519449.71                               | 12.496                                                     |  |  |
|  |  | L-Iditol                                                                                                                                                                                    | C6 H14 O6          | 488-45-9    | Organooxygen compounds              | 182.07823        | 0.751    | 182.07904                           | -4   | 115710254.2                               | 56.659                                                     |  |  |
|  |  | D-(-)-Quinic acid                                                                                                                                                                           | C7 H12 O6          | 77-95-2     | Organooxygen compounds              | 192.06265        | 5.242    | 192.06339                           | -3   | 504206943.1                               | 246.890                                                    |  |  |
|  |  | D-Saccharic acid                                                                                                                                                                            | C6 H10 O8          | 87-73-0     | Organooxygen compounds              | 210.03691        | 0.794    | 210.03757                           | -3   | 43260242.29                               | 21.183                                                     |  |  |
|  |  | α,α-Trehalose                                                                                                                                                                               | C12 H22 O11        | 99-20-7     | Organooxygen compounds              | 342.1161         | 0.808    | 342.11621                           | 0    | 5631515225                                | 2757.527                                                   |  |  |
|  |  | Neochlorogenic acid                                                                                                                                                                         | C16 H18 O9         | 906-33-2    | Organooxygen compounds              | 354.09507        | 5.394    | 354.09508                           | 0    | 1296457744                                | 634.823                                                    |  |  |
|  |  | Chlorogenic acid                                                                                                                                                                            | C16 H18 O9         | 327-97-9    | Organooxygen compounds              | 354.09514        | 5.243    | 354.09508                           | 0    | 3930805593                                | 1924.758                                                   |  |  |
|  |  | Sweroside                                                                                                                                                                                   | C16 H22 O9         | 14215-86-2  | Organooxygen compounds              | 358.12649        | 5.807    | 358.12638                           | 0    | 998625431.5                               | 488.987                                                    |  |  |
|  |  | 3-O-Feruloylquinic acid                                                                                                                                                                     | C17 H20 O9         | 62929-69-5  | Organooxygen compounds              | 368.11076        | 6.127    | 368.11073                           | 0    | 74295211.98                               | 36.379                                                     |  |  |
|  |  | metamifop                                                                                                                                                                                   | C23 H18 Cl F N2 O4 | 256412-89-2 | Organooxygen compounds              | 440.09266        | 0.79     | 440.09391                           | -2   | 944872245.4                               | 462.666                                                    |  |  |
|  |  | Bioside                                                                                                                                                                                     | C20 H30 O12        | NA          | Organooxygen compounds              | 462.17406        | 4.482    | 462.17373                           | 0    | 9161931.886                               | 4.486                                                      |  |  |
|  |  | 4,5-Dicaffeoylquinic acid                                                                                                                                                                   | C25 H24 O12        | 14534-61-3  | Organooxygen compounds              | 516.12702        | 7.267    | 516.12678                           | 0    | 1597889674                                | 782.423                                                    |  |  |
|  |  | STACHYOSE                                                                                                                                                                                   | C24 H42 O21        | 470-55-3    | Organooxygen compounds              | 666.22242        | 0.748    | 666.22186                           | 0    | 3068232998                                | 1502.391                                                   |  |  |
|  |  | Angorside C                                                                                                                                                                                 | C36 H48 O19        | 115909-22-3 | Organooxygen compounds              | 784.2801         | 7.091    | 784.27898                           | 1    | 214866462.1                               | 105.211                                                    |  |  |
|  |  | 4-[(Trifluoromethyl)sulfonyl]phenyl dihydrogen phosphate                                                                                                                                    | C7 H6 F3 O4 P S    | NA          | Others                              | 273.96629        | 0.675    | 273.96765                           | -4   | 295703579.2                               | 144.794                                                    |  |  |
|  |  | 1-(β-D-Glucopyranosyloxy)-7-methyl-1,4a,5,6,7,7a-hexahydrocyclopenta[c]pyran-4-carboxylic acid                                                                                              | C16 H24 O9         | NA          | Others                              | 360.14206        | 6.386    | 360.14203                           | 0    | 273312708.4                               | 133.830                                                    |  |  |
|  |  | MFCD01051705                                                                                                                                                                                | C17 H19 Cl N4 O2 S | NA          | Others                              | 378.09282        | 0.782    | 378.09172                           | 2    | 1928508368                                | 944.313                                                    |  |  |
|  |  | 1-(3-Ethoxyphenyl)-7-fluoro-2-(4-methyl-2-pyridinyl)-1,2-dihydrochromeno[2,3-c]pyrrole-3,9-dione                                                                                            | C25 H19 F N2 O4    | NA          | Others                              | 430.13241        | 0.859    | 430.13289                           | -1   | 227012094.3                               | 111.159                                                    |  |  |
|  |  | N-(4-Sulfamoylphenyl)-2-(3,4,5-trimethoxybenzoyl)hydrazinocarbothioamide                                                                                                                    | C17 H20 N4 O6 S2   | NA          | Others                              | 440.08409        | 0.858    | 440.08243                           | 3    | 1665144987                                | 815.355                                                    |  |  |
|  |  | 2-[3,8-Dihydroxy-8-(hydroxymethyl)-3-methyl-2-oxodecahydro-5-azulenyl]-2-propanyl hexopyranoside                                                                                            | C21 H36 O10        | NA          | Others                              | 448.23092        | 8.536    | 448.23085                           | 0    | 246340008.3                               | 120.623                                                    |  |  |
|  |  | Methyl 2-[(2-O-(6-deoxy-α-L-mannopyranosyl)-β-D-glucopyranosyl]oxy]benzoate                                                                                                                 | C20 H28 O12        | NA          | Others                              | 460.15825        | 6.298    | 460.15808                           | 0    | 8743955.912                               | 4.282                                                      |  |  |
|  |  | 1,6-Bis-O-(3,4,5-trihydroxybenzoyl)hexopyranose                                                                                                                                             | C20 H20 O14        | NA          | Others                              | 484.08525        | 5.079    | 484.08531                           | 0    | 8934441.88                                | 4.375                                                      |  |  |
|  |  | 4,5-Di(4-biphenyl)-2-(3,4-dimethoxyphenyl)-1H-imidazole                                                                                                                                     | C35 H28 N2 O2      | NA          | Others                              | 508.21589        | 6.804    | 508.21508                           | 1    | 317510235.1                               | 155.472                                                    |  |  |
|  |  | 2-[(2Z)-3-(2-Furylmethyl)-2-[(2E)-[(2E)-2-methyl-3-phenyl-2-propen-1-ylidene]hydrazone]-4-oxo-1,3-thiazolidin-5-yl]-N-(3-(trifluoromethyl)phenyl)acetamide                                  | C27 H23 F3 N4 O3 S | NA          | Others                              | 540.1457         | 0.77     | 540.1443                            | 2    | 188676530.4                               | 92.387                                                     |  |  |
|  |  | Liquiritigenin-7-O-β-D-apiosyl-4'-O-β-D-glucoside                                                                                                                                           | C26 H30 O13        | NA          | Others                              | 550.16954        | 7.436    | 550.16864                           | 1    | 66150902.62                               | 32.391                                                     |  |  |
|  |  | 2-(3,4-Dihydroxyphenyl)-5,7-dihydroxy-4-oxo-4H-chromen-3-yl 6-O-β-D-xylopyranosyl-β-D-glucopyranoside                                                                                       | C26 H28 O16        | NA          | Others                              | 596.1382         | 6.262    | 596.13773                           | 0    | 14983736.38                               | 7.337                                                      |  |  |
|  |  | 2-(3,4-Dihydroxyphenyl)ethyl 3-O-(6-deoxy-β-L-mannopyranosyl)-6-O-[(2E)-3-(3,4-dihydroxyphenyl)-2-propenyl]-β-D-glucopyranoside                                                             | C29 H36 O15        | NA          | Others                              | 624.2057         | 6.612    | 624.20542                           | 0    | 40775218.88                               | 19.966                                                     |  |  |
|  |  | (3aS,6R,6aS,9aR,10aS,10bR)-2,8-Bis(4-benzoylphenyl)-6-[5-(hydroxymethyl)-2-furyl]-3a,4,6,6a,9a,10,10a,10b-octahydroisoindo[5,6-e]isoindole-1,3,7,9(2H,8H)-tetrone                           | C45 H34 N2 O8      | NA          | Others                              | 730.2328         | 6.159    | 730.23152                           | 1    | 259747211.4                               | 127.188                                                    |  |  |
|  |  | N-(4-(4R,6S)-4-[4-(hydroxymethyl)phenyl]-6-[[5-methyl-1,3,4-thiadiazol-2-yl]sulfonyl]methyl)-1,3-dioxan-2-yl)benzyl)-Nalpha-[(4-methylphenyl)sulfonyl]-D-phenylalaninamide                  | C38 H40 N4 O6 S3   | NA          | Others                              | 744.21223        | 5.227    | 744.211                             | 1    | 557744277.3                               | 273.105                                                    |  |  |
|  |  | (5Z,5'Z)-3,3'-(4-Benzoyl-1,2-phenylene)bis[5-(3-nitrobenzylidene)-2-phenyl-3,5-dihydro-4H-imidazol-4-one]                                                                                   | C45 H28 N6 O7      | NA          | Others                              | 764.19978        | 0.761    | 764.20195                           | -2   | 339166878.1                               | 166.076                                                    |  |  |
|  |  | N-(tert-Butoxycarbonyl)-L-tryptophyl-N'-6'-[(2-methylphenyl)carbamoyl]-L-lysyl-L-alpha-aspartyl-Nalpha-methyl-L-phenylalaninamide                                                           | C44 H56 N8 O9      | NA          | Others                              | 840.41536        | 10.344   | 840.41703                           | -1   | 273049989.6                               | 133.702                                                    |  |  |
|  |  | N-(3-Chloro-4-morpholinophenyl)-6-oxo-1,4,5,6-tetrahydro-3-pyridazinocarboxamide                                                                                                            | C15 H17 Cl N4 O3   | NA          | Oxazinanes                          | 336.09776        | 4.682    | 336.09892                           | -3   | 48869722.7                                | 23.930                                                     |  |  |
|  |  | 3,4-Dihydroxyphenylacetic acid                                                                                                                                                              | C8 H8 O4           | 102-32-9    | Phenols                             | 168.04144        | 5.631    | 168.04226                           | -4   | 45124510.42                               | 22.096                                                     |  |  |
|  |  | Danshensu                                                                                                                                                                                   | C9 H10 O5          | 76822-21-4  | Phenylpropanoic acids               | 198.05229        | 3.009    | 198.05282                           | -2   | 115916540.4                               | 56.760                                                     |  |  |
|  |  | Nardosinone                                                                                                                                                                                 | C15 H22 O3         | 23720-80-1  | Prenol lipids                       | 250.15678        | 8.819    | 250.15689                           | 0    | 69549492.25                               | 34.056                                                     |  |  |
|  |  | (±)-Abscisic acid                                                                                                                                                                           | C15 H20 O4         | 14375-45-2  | Prenol lipids                       | 264.13603        | 8.549    | 264.13616                           | 0    | 11448996.17                               | 5.606                                                      |  |  |
|  |  | 3-[(3aS,8R,8aR)-8-hydroxy-6,8-dimethyl-3-methylidene-2-oxo-3a,4,5,8a-tetrahydrocyclohepta[b]furan-7-yl]propanoic acid                                                                       | C1                 |             |                                     |                  |          |                                     |      |                                           |                                                            |  |  |
